## Limitations of machine learning in psychiatry: Participation in the PAC 2018 depression challenge

Fabian Eitel, Sebastian Stober, Lea Waller, Lena Dorfschmidt, Henrik Walter, Kerstin Ritter\*

\*Corresponding author: [kerstin.ritter@charite.de](mailto:kerstin.ritter@charite.de)

The authors have withdrawn this manuscript because the results were posted in error. The authors do not wish this work to be cited as reference for the project. Please contact the corresponding author if you have any questions.
